# Supplementary material
Source: Research Square preprint supplement (doi:10.21203/rs.3.rs-8981554/v1)
Supplement: Supplementary file 1 [file 23893b710fb3b02422526861.pdf]

## **SUPPLEMENTARY MATERIALS**

**Supplementary Figure 1: Example of x20 hemocytometer image used to measure RBC cell concentration for each sample group. This approach was repeated for each donor for both Pump-only and Affinity Pixie™ Oxygenator *ex vivo* ECMO circuits.**
